# Supplementary material for: Evaluation of N-NOSE as a surveillance tool for recurrence in gastric and esophageal cancers: a prospective cohort study
Source: PubMed Central journal article supplement (PMC11656990; doi:10.1186/s12885-024-13327-x), 2024-12-18
Supplement: 12885_2024_13327_MOESM1_ESM.pdf [file 12885_2024_13327_MOESM1_ESM.pdf]

### Before chemotherapy and/or surgery

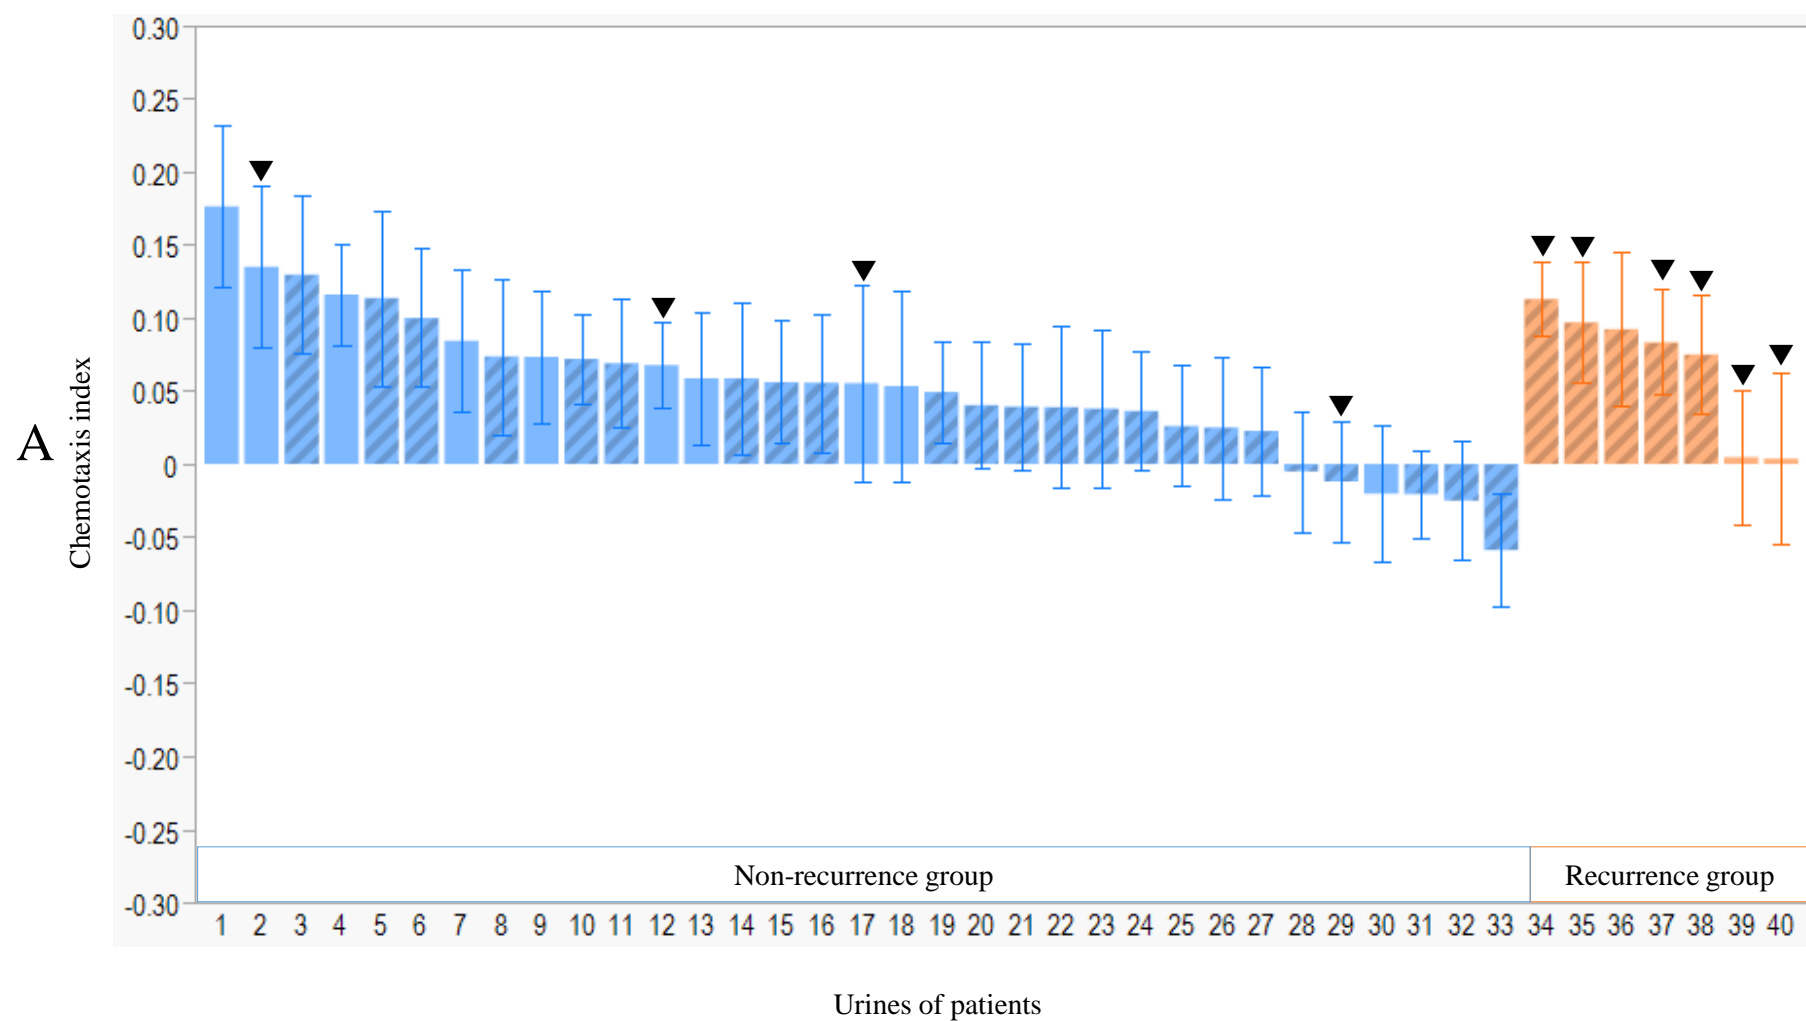

### After chemotherapy

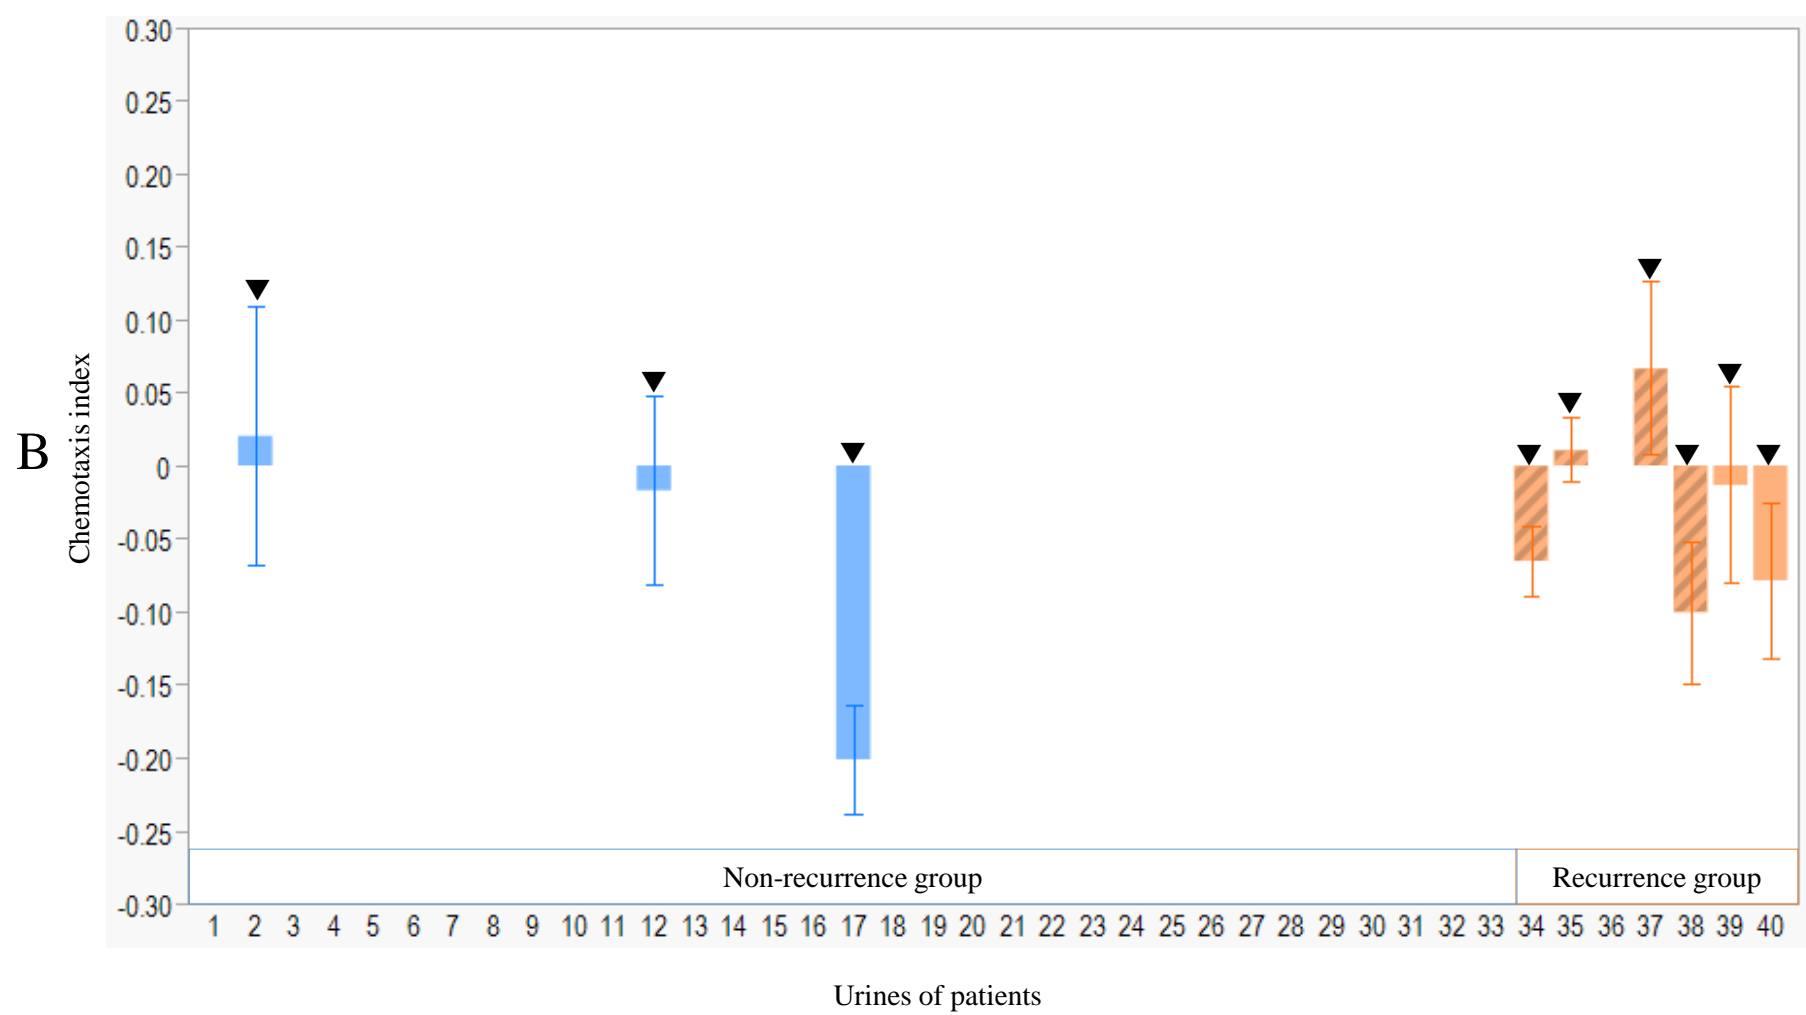

### 1 month after surgery

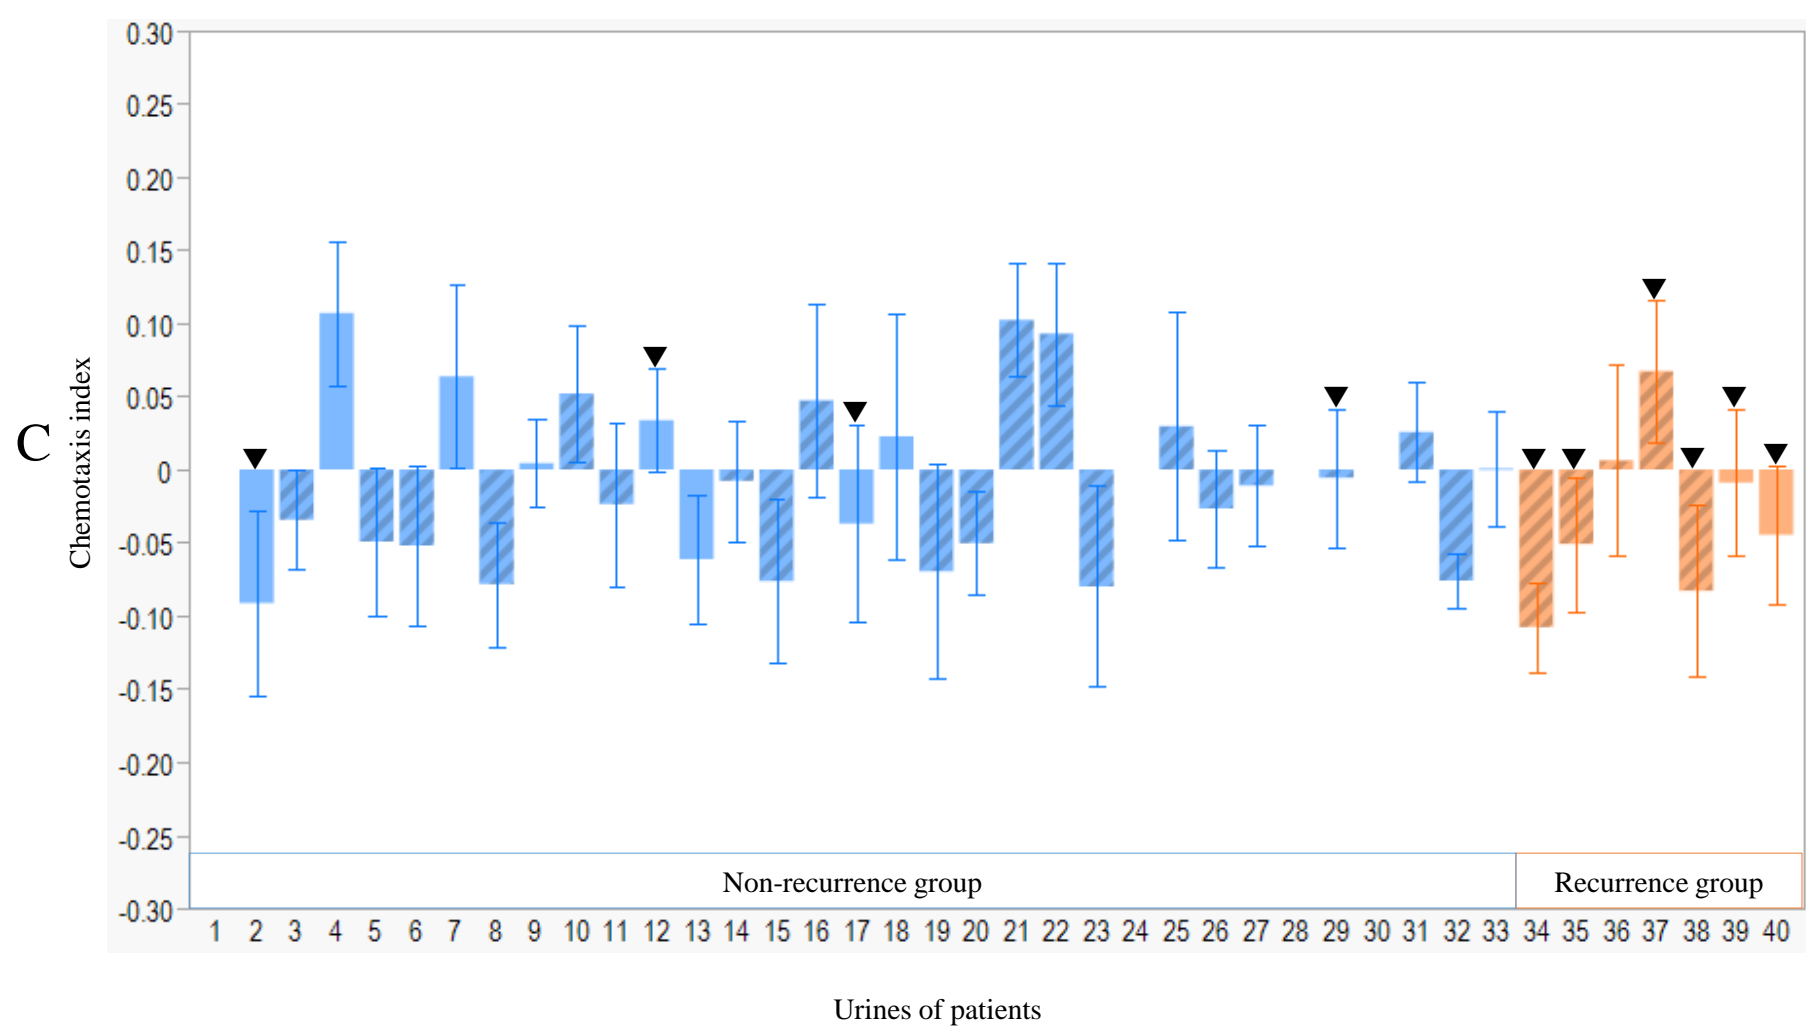

### 3 months after surgery

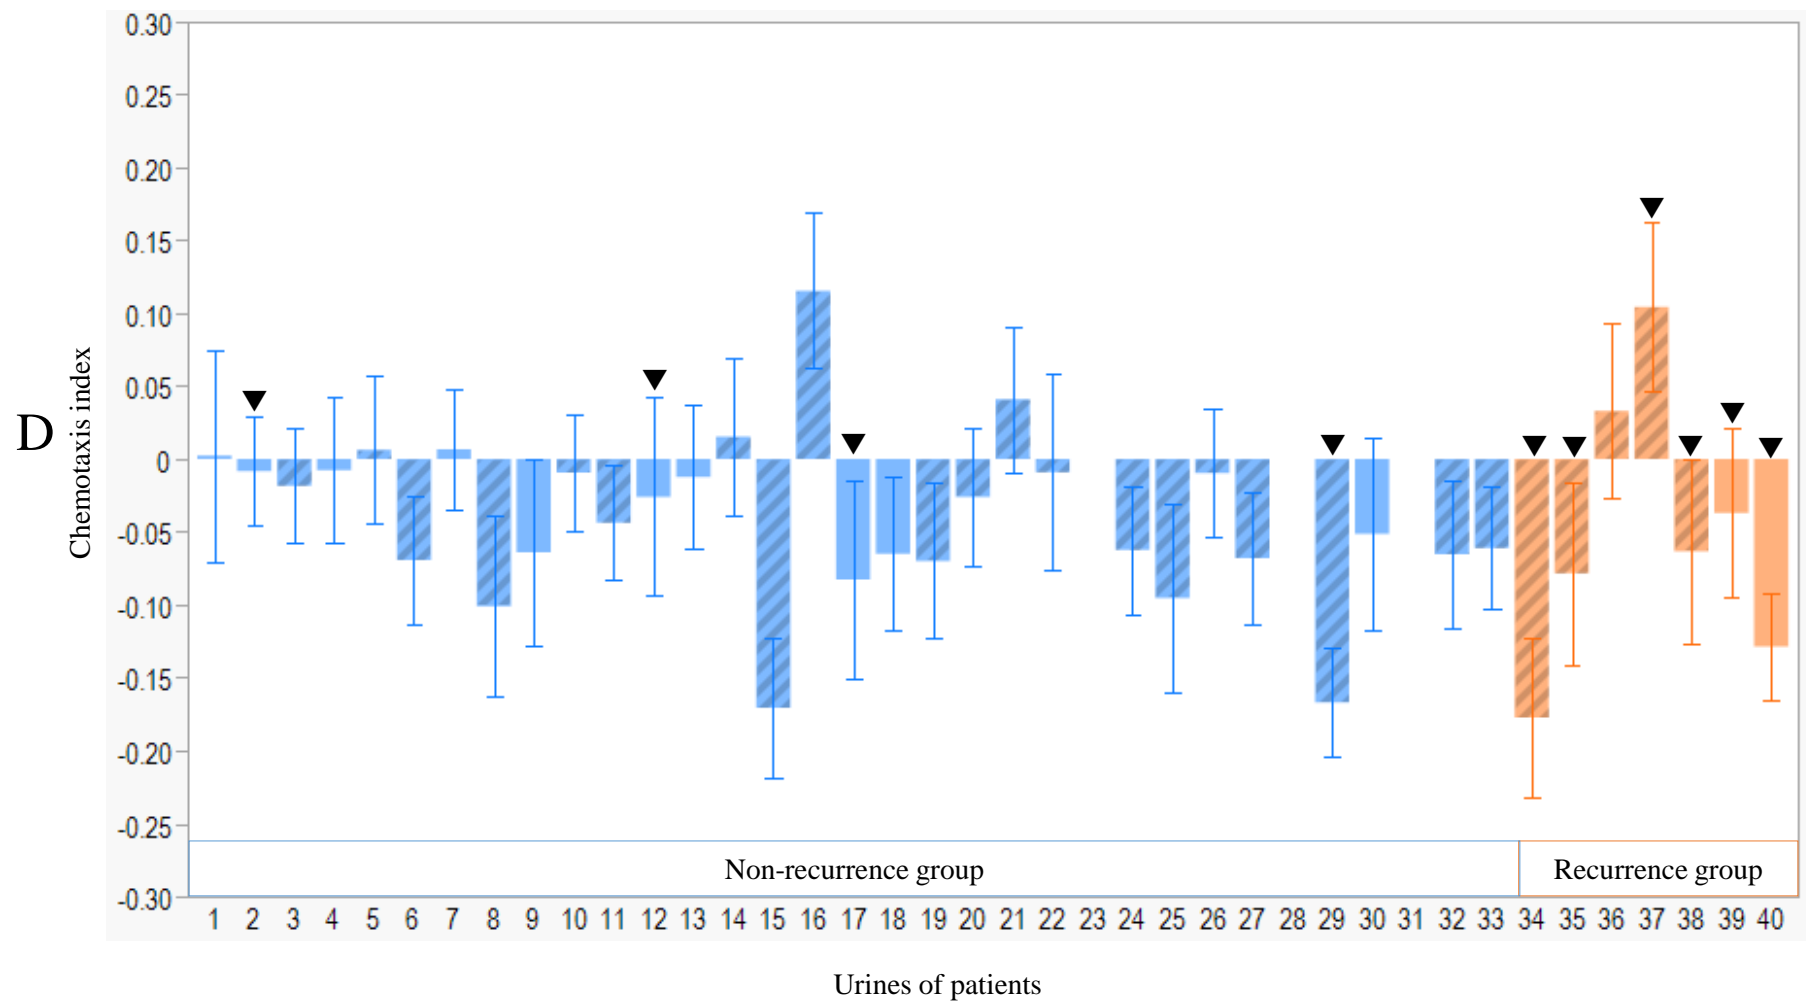

### 6 months after surgery

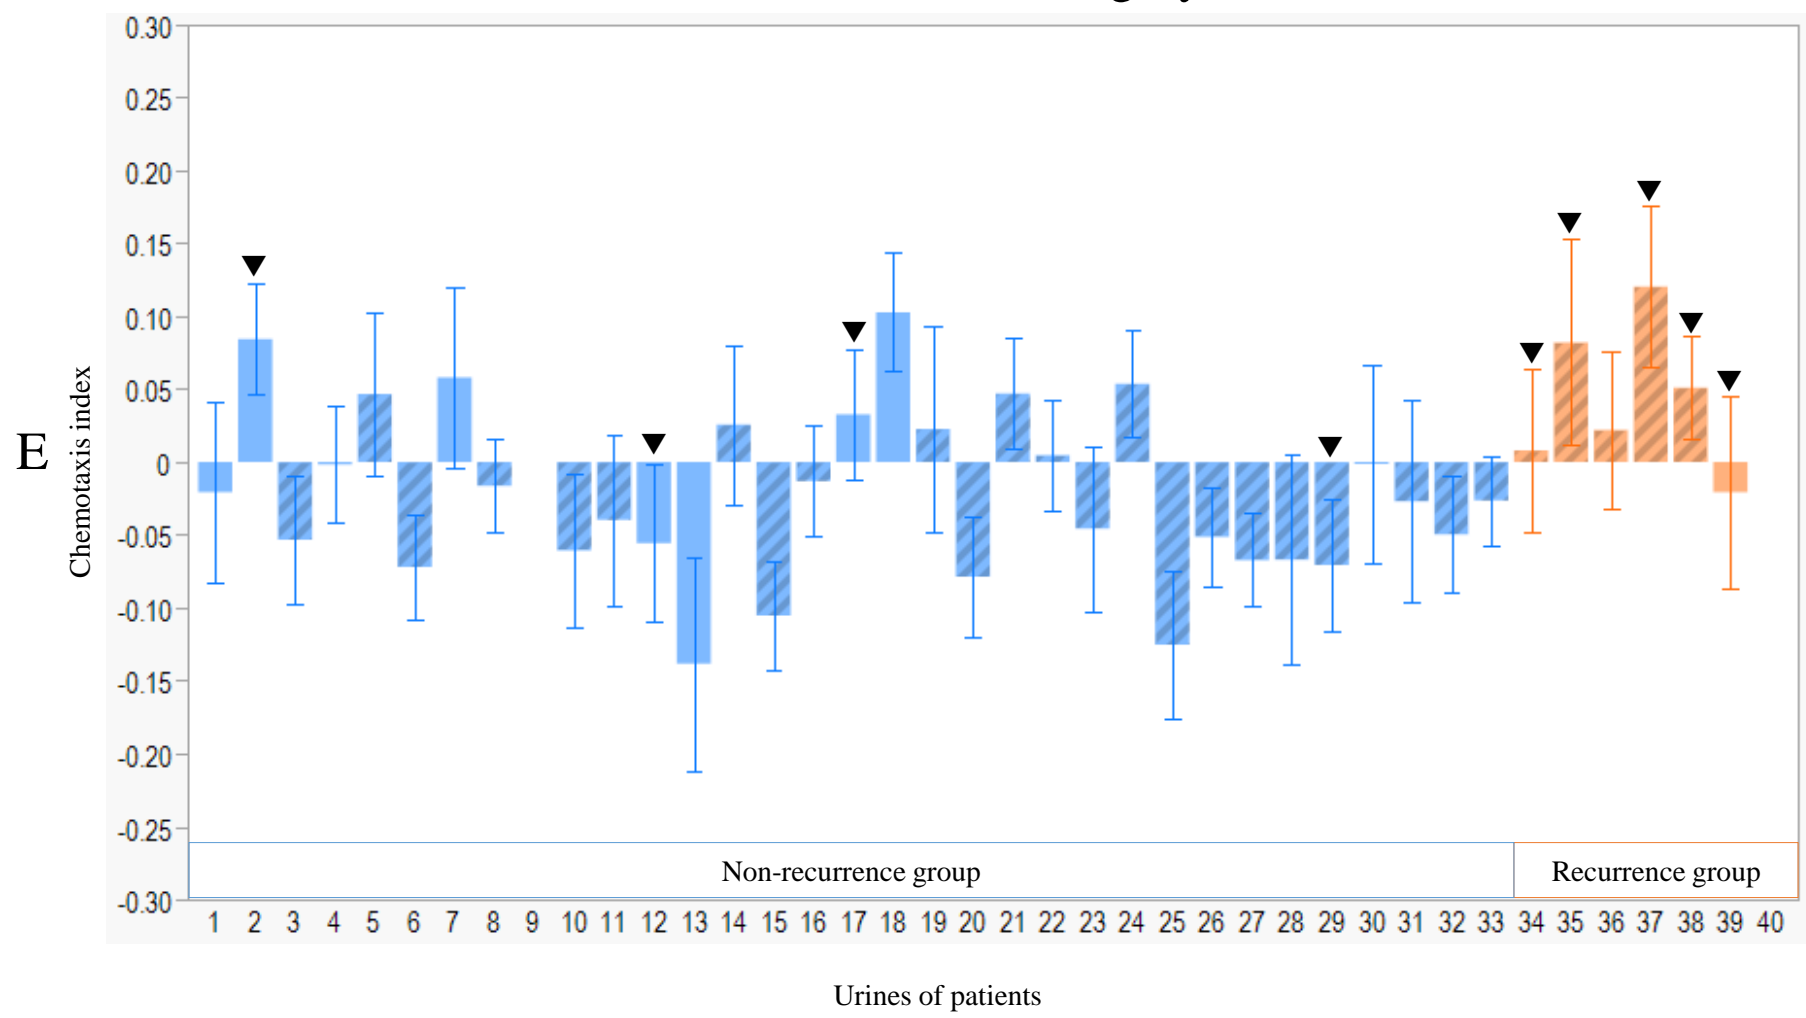

### 1 year after surgery

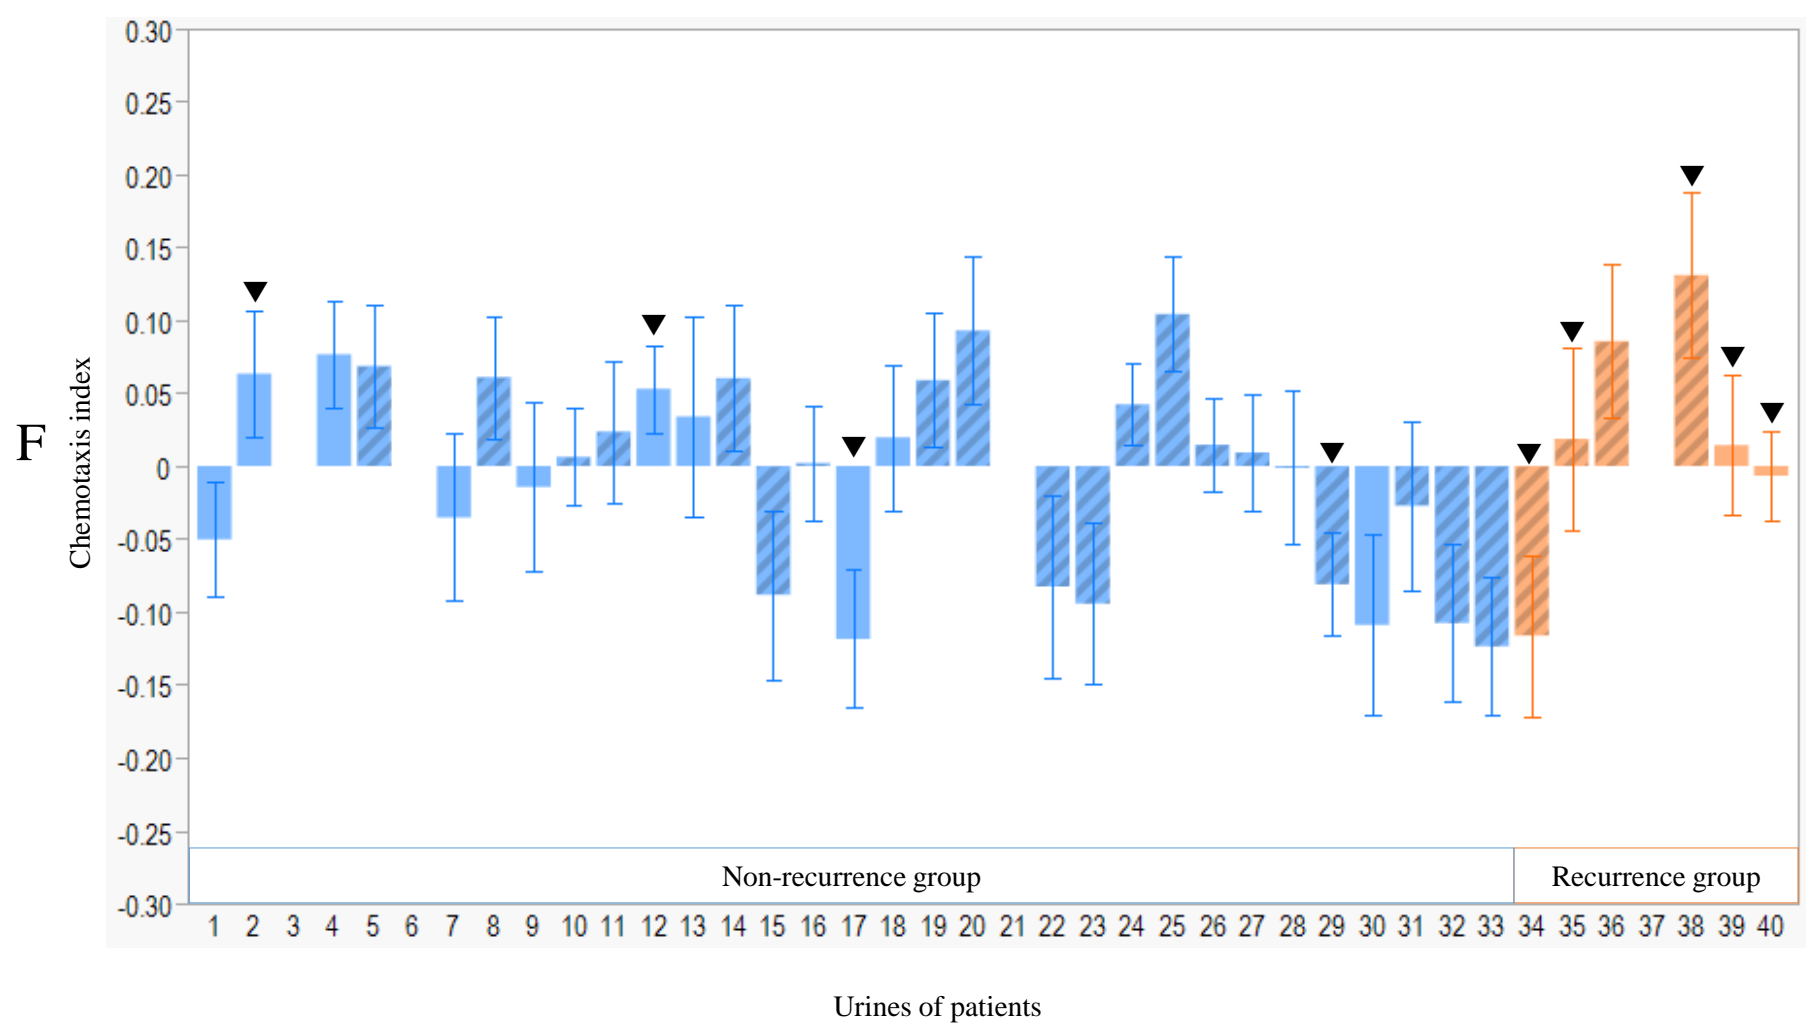

## 2 years after surgery

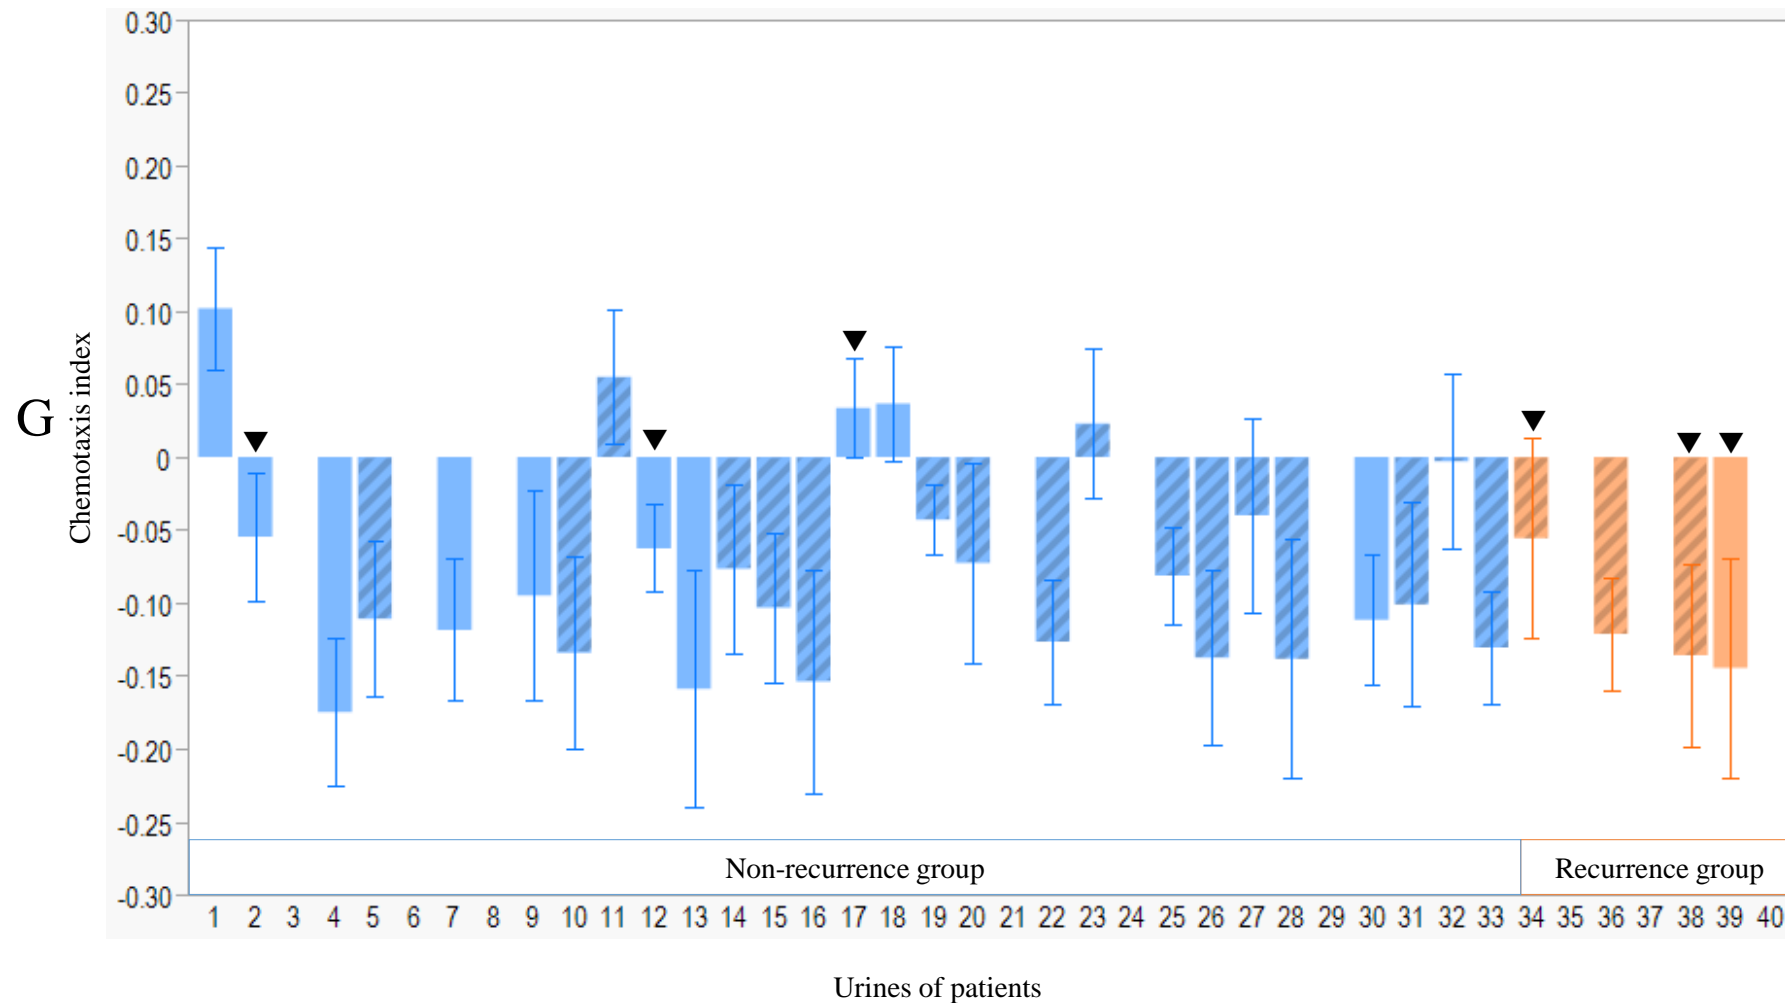

**Supplemental Figure 1. Comparison of chemotaxis indexes of 40 cancer cases before and after surgery (100-fold dilution).** The *C. elegans* chemotaxis assays were performed using urine samples collected at before chemotherapy and/or surgery and after chemotherapy, 1-month, 3-month, 6-month, 1-year, and 2-year after surgery from 40 cancer patients. The chemotaxis indexes were calculated based on the chemotaxis assays (100-fold dilution) and aligned in bar graphs with the order from highest to lowest (samples numbered as 1 to 40) at the timepoint of sampling before chemotherapy and/or surgery. Urine samples tested: (A) before chemotherapy and/or surgery, After chemotherapy (B), 1 month (C), 3 months (D), 6 months (E), 1 year (F), and 2 years (G) after surgery. Orange bars: patients with recurrence, and diagonal line bars; patients with vascular invasion, and black arrow heads: patients with chemotherapy. Error bars represented the standard error of the mean.
